# Supplementary material for: Clinical features and survival outcomes of patients with lymphoplasmacytic lymphoma, including non-IgM type, in Korea: a single-center experience
Source: PubMed Central journal article supplement — Blood Res. 2018 Sep 28;53(3):189–97. doi: 10.5045/br.2018.53.3.189 (PMC6170298; doi:10.5045/br.2018.53.3.189), 2018-09-28
Supplement: br-53-189-s001.pdf [file br-53-189-s001.pdf]

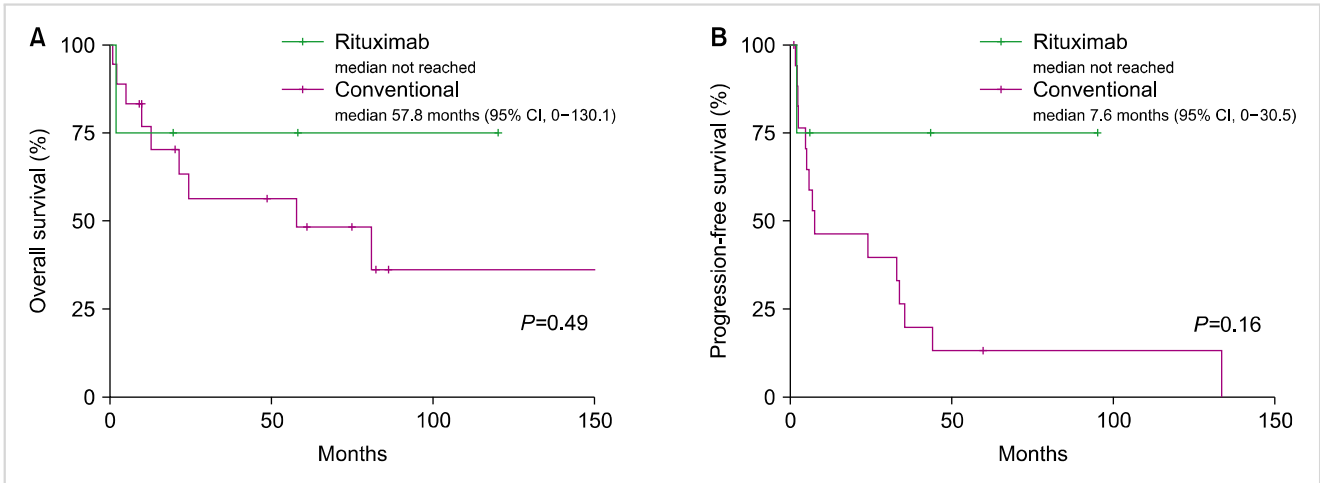

**Supplementary Fig 1.** Overall survival (A) and progression-free survival (B) of patients treated with rituximab-based regimen and conventional chemotherapy.
